# Supplementary material
Source: publisher figshare collection journal article supplement (https://acs.figshare.com/ndownloader/files/5817990)
Supplement: Supplementary file 1 [file 5817990]

#### Terms & Conditions

Electronic Supporting Information files are available without a subscription to ACS Web Editions. The American Chemical Society holds a copyright ownership interest in any copyrightable Supporting Information. Files available from the ACS website may be downloaded for personal use only. Users are not otherwise permitted to reproduce, republish, redistribute, or sell any Supporting Information from the ACS website, either in whole or in part, in either machine-readable form or any other form without permission from the American Chemical Society. For permission to reproduce, republish and redistribute this material, requesters must process their own requests via the RightsLink permission system. Information about how to use the RightsLink permission system can be found at <http://pubs.acs.org/page/copyright/permissions.html>

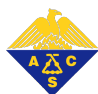

ACS Publications

MOST TRUSTED. MOST CITED. MOST READ.

Copyright © 1997 American Chemical Society

## UV-visible spectral data for cation-radicals and dications of quaterpyrrole and dimethylquaterpyrrole.

Cyclic voltammetry of a solution of quaterpyrrole displays two reversible waves corresponding to the formation of the cation-radical ( $E^\circ = 0.16_0$  V/SCE) and the dication ( $E^\circ = 0.43_5$  V/SCE)<sup>1</sup>. Oxidation of a solution of quaterpyrrole by 2 eq  $\text{FeCl}_3$ <sup>2</sup> gives a large increase of absorbance in the visible (518 nm) and in the near IR (945nm) due to the formation of the cation-radical. At room temperature, this cation radical is not completely stable and disappears in 3-5 minutes to give a broad absorption around 600nm. After addition of two more equivalents of  $\text{FeCl}_3$ , new peaks develop at 360 nm and 658 nm that can be ascribed to the dication. (Figure 1a). If the solution containing the cation-radical of the quaterpyrrole is cooled down fast enough to avoid chemical degradation, the peak at 518 decreases and two new peaks appear at lower wavelengths, at (440-450) nm and 740 nm. This new absorption disappears when the solution is returned to room temperature. From Meijer's results concerning stable cation-radicals from oligopyrrole, these new absorptions are ascribed to  $\pi$ -dimers<sup>10c</sup>. Using the molar absorptivity,  $\epsilon$ , at room temperature for the cation-radical (determined from the oxidation by  $\text{FeCl}_3$  and assuming a stoichiometry  $\frac{1}{2}$  for this oxidant in aprotic solvent<sup>2</sup>), we can estimate the equilibrium constant of  $\pi$ -dimerization<sup>3</sup>. We found  $K = 70$  and  $K = 1.5 \cdot 10^4 \text{ L.mol}^{-1}$  at 20°C and -35°C, respectively (Figure 1b). To obtain the spectra for the dimethylquaterpyrrole, we oxidized a solution of monomethylbipyrrrole with  $\text{FeCl}_3$ . Upon adding several quantities of the oxidant, the solution first develops absorbances very similar to those found for the cation-radical of the quaterpyrrole and then absorbances similar to those of the dication of the quaterpyrrole. The spectral characteristics for the quaterpyrroles with their cation-radicals and dications are summarized in Table 1.

**Table 1.** Spectral Characteristics of Quaterpyrroles.

| $\lambda_{\text{max}}$ (nm) | Neutral | Cation-radical | Dication | $\pi$ -dimer |
|-----------------------------|---------|----------------|----------|--------------|
| quaterpyrrole               | 344     | 518, 945       | 360, 660 | 445, 740     |
| dimethylquaterpyrrole       | 349     | 532, 980       | 360, 685 |              |

## References

- (1) Andrieux, C. P.; Hapiot, P.; Audebert, P.; Guyard L.; Nguyen Dinh An, M.; Groenendaal, L.; Meijer, E.W. *Chem. Mater.*, **1997**, 9,723.
- (2) (a) The half reaction for the  $\text{FeCl}_3/\text{FeCl}_2$  couple is reported to be in  $\text{CH}_2\text{Cl}_2$ :  $2 \text{FeCl}_3 + e^- \rightarrow \text{FeCl}_2 + \text{FeCl}_4^-$  <sup>2b</sup>. (b) Fichou, D.; Horowitz, G.; Xu, B.; Garnier, F. *Synth. Met.* **1990**, 39, 243.
- (3) Miller, L.L.; Mann, K.R. *Acc. Chem. Res.* **1996**, 29; 417.

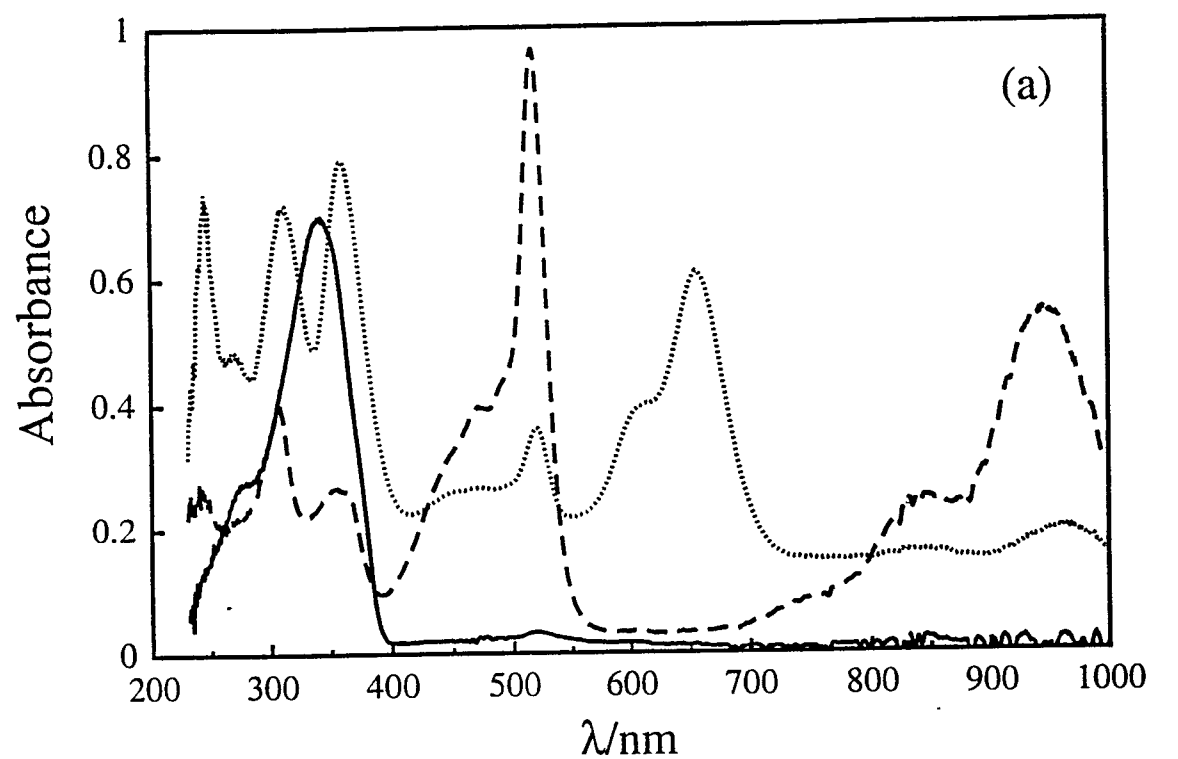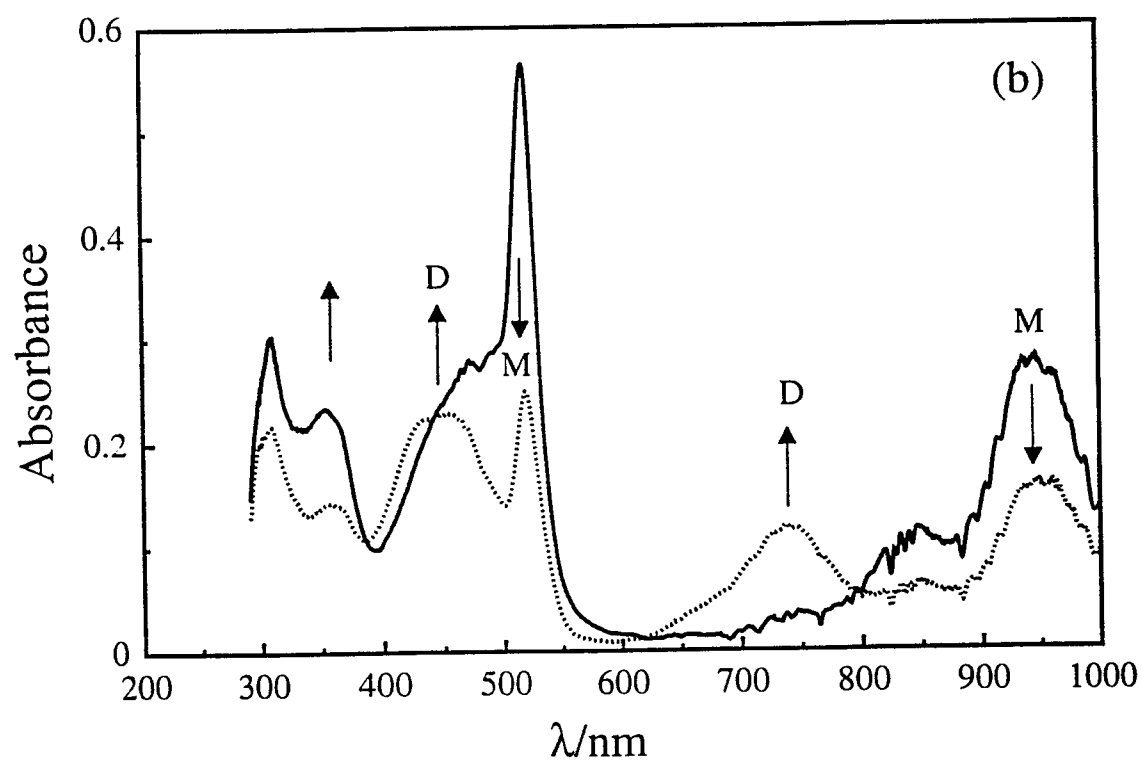

**Figure 1.** Chemical oxidation of quaterpyrrole by  $\text{FeCl}_3$ . (a) (—) neutral quaterpyrrole, (---) cation-radical, (...) dication,  $T=20^\circ\text{C}$ . (b) (—) cation radical at  $20^\circ\text{C}$ , (...) formation of the  $\pi$ -dimer (D) at  $-35^\circ\text{C}$ .
